# Supplementary material for: Improved photodegradation of a superabsorber via carbon dots as electron transfer stations
Source: Royal Society of Chemistry journal article supplement (doi:10.1039/d4nr03311f), 2024-01-01
Supplement: d4nr03311f1.pdf [file d4nr03311f1.pdf]

## **Supporting Information for**

Improved photodegradation of superabsorber via carbon dots as electron  
transfer station

Shuxin Sui<sup>a</sup>, Fengjiao Zhao<sup>a\*</sup>, Tianfu Zhang<sup>a</sup>, Zhen Chen<sup>b</sup> and Hongming  
Yin<sup>a\*</sup>

<sup>a</sup> School of Science, Dalian Maritime University, Dalian, Liaoning 116026,  
China

<sup>b</sup> Institute of Advanced Science Facilities, Shenzhen, Guangdong 518107,  
China

## **Content List**

**SI1. Raman spectrum of CDs.**

**SI2. FTIR spectra of chemicals and CDs.**

**SI3. UV-vis absorption, PL and PLE spectra of CDs.**

**SI4. Photodegradation efficiency of PAA-Na in all systems.**

**SI5. Transient emission (TE) kinetics fitting method and results.**

**SI6. Transient absorbance (TA) spectra.**

**SI7. TA kinetics fitting method and results.**

**SI8. Comparison of TE and TA kinetics of CDs.**

## SI1. Raman spectrum of CDs

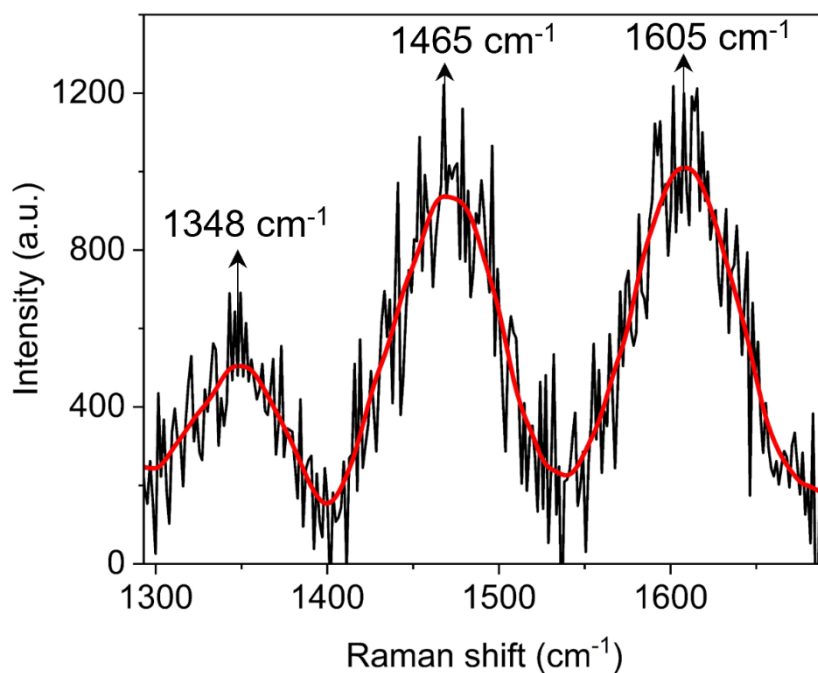

**Figure S1.** Raman spectrum of as-synthesized CDs.

## SI2. FTIR spectra of chemicals and as-synthesized CDs

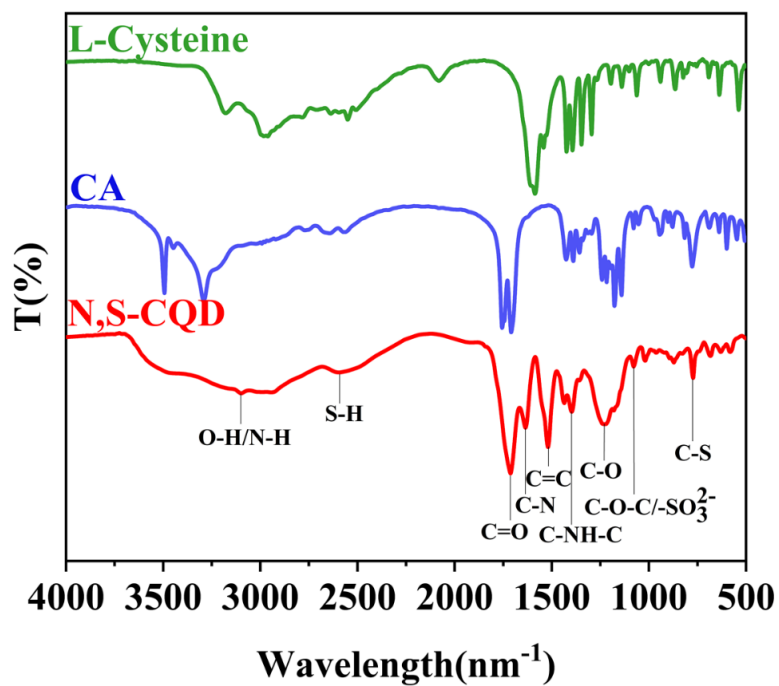

**Figure S2.** FTIR spectra of CA, L-Cysteine and the as-synthesized CDs.

### SI3. UV-vis absorption, PL and PLE spectra of CDs.

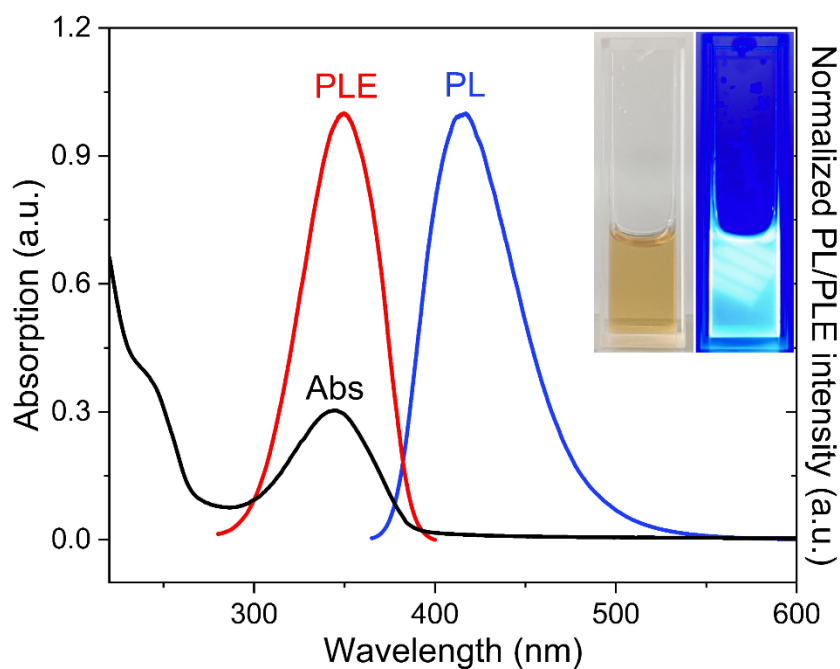

**Figure S3.** UV-vis absorption, PL and PLE spectra of as-synthesized CDs.

Insert is the images of CDs aqueous solution with and without UV irradiation.

### SI4. Photodegradation efficiency of PAA-Na in all systems.

**Table S1.** Photodegradation efficiency of PAA-Na in all systems under UV irradiation within 10 min.

| <div>time/min</div> <div>systems</div> | 0 | 4     | 6     | 8     | 10    |
|----------------------------------------|---|-------|-------|-------|-------|
| PAA-Na                                 | 0 | 0.678 | 0.792 | 0.857 | 0.954 |
| PAA-Na+CDs                             | 0 | 0.696 | 0.836 | 0.872 | 0.962 |
| PAA-Na+TiO <sub>2</sub>                | 0 | 0.552 | 0.691 | 0.816 | 0.932 |
| PAA-Na+TiO <sub>2</sub> +CDs           | 0 | 0.852 | 0.918 | 0.96  | 0.983 |

### SI5. Transient emission (TE) kinetics fitting method and results.

TE decay kinetics for all samples at specific emission wavelengths (Figure 5d-5j) are fitted by single exponential decay function which is

$$y = A \exp\left(-\frac{x}{\tau}\right) + y_0 \quad Eq.S1$$

Fitting results are listed in Table S2.

**Table S2.** TE kinetics fitting results of all systems.

| parameters<br>systems       | A        | y <sub>0</sub> | τ/ns  | Adj.R <sup>2</sup> |
|-----------------------------|----------|----------------|-------|--------------------|
| PAA-Na                      | -208.51  | -1.98          | 9.98  | 0.995              |
| CDs                         | -763.71  | 1.44           | 25.5  | 0.990              |
| TiO <sub>2</sub>            | -1458.60 | -0.88          | 5.71  | 0.994              |
| PAA-Na+ CDs                 | -176.39  | -0.67          | 17.88 | 0.998              |
| PAA-Na+TiO <sub>2</sub>     | -1532.69 | -1.03          | 6.27  | 0.995              |
| PAA-Na+CDs+TiO <sub>2</sub> | -582.32  | -1.49          | 4.97  | 0.993              |
| CDs+TiO <sub>2</sub>        | -1037.95 | -0.87          | 5.22  | 0.993              |

## SI6. Transient absorption (TA) spectra.

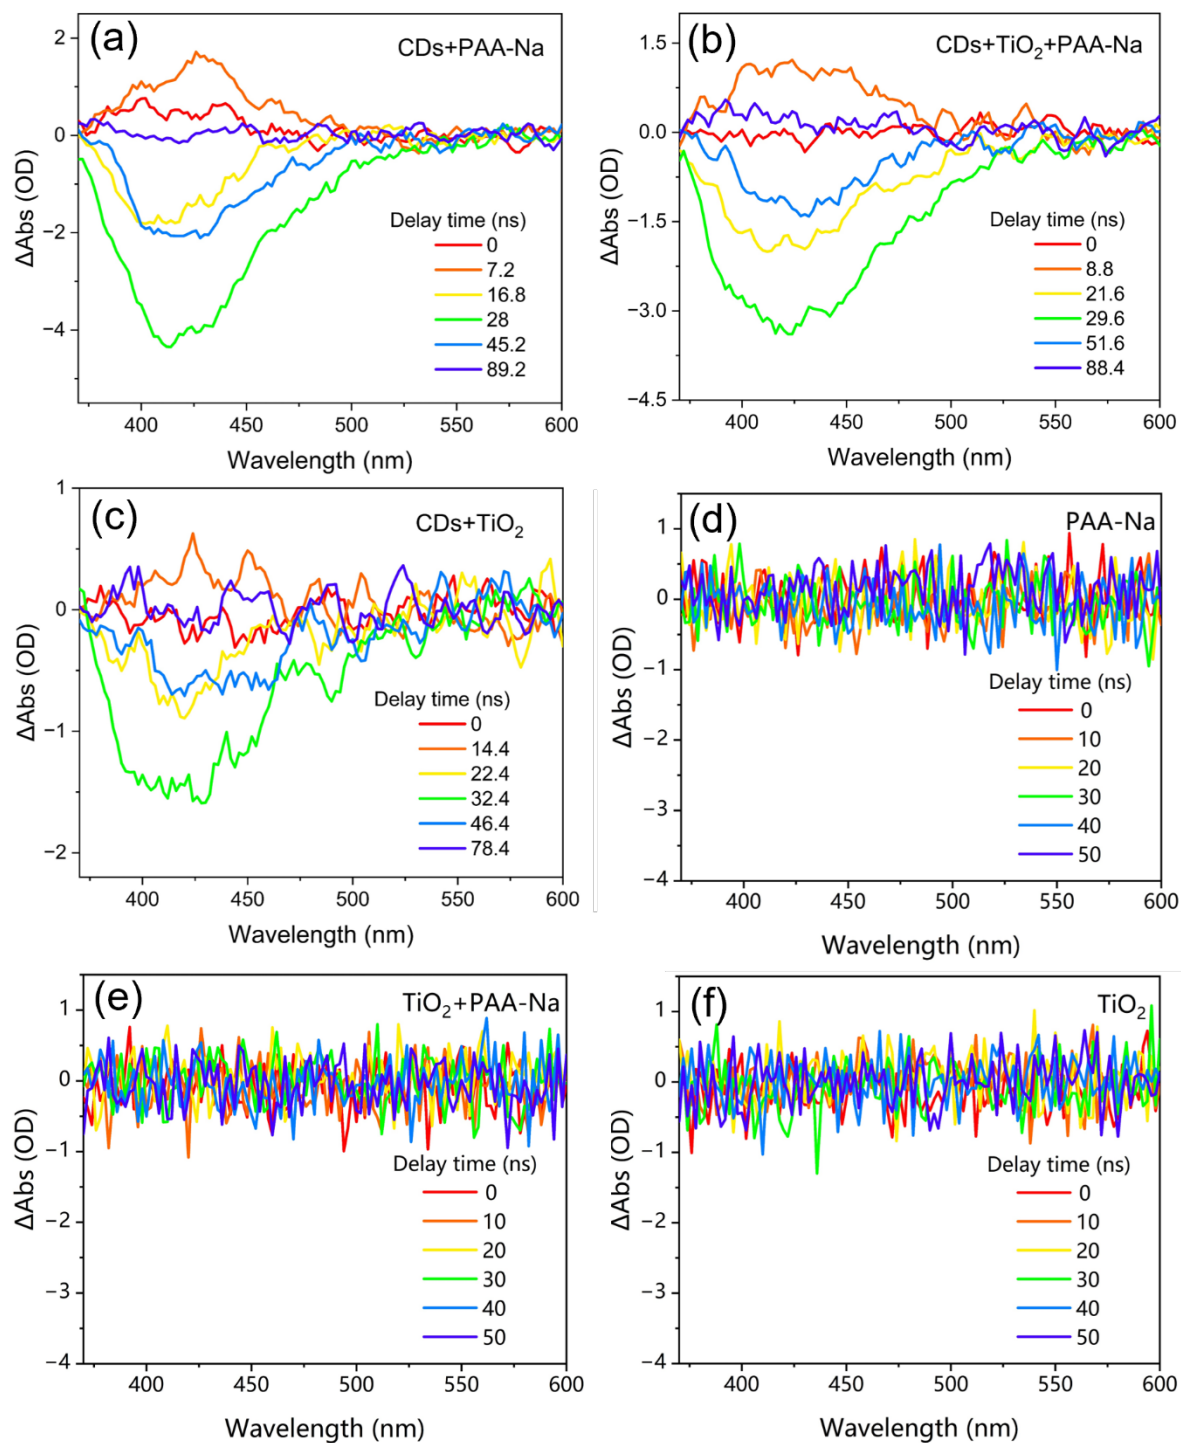

**Figure S4.** TA spectra (excited @ 365 nm) in 380-600 nm region of different systems at different delay times ranging from 0 ns to 89 ns.

### SI7. TA kinetics fitting method and results.

TA kinetics in Figure 6(c-f) are fitted by single exponential decay function (Eq. S1) and detailed fitting results are listed in Table S3.

**Table S3.** TA kinetics fitting results.

| parameters<br>systems        | A      | $y_0$ | $\tau/\text{ns}$ | Adj. $R^2$ |
|------------------------------|--------|-------|------------------|------------|
| CDs                          | -19.92 | 0.09  | 14.27            | 0.78       |
| CDs+TiO <sub>2</sub>         | -18.37 | 0.18  | 14.82            | 0.79       |
| CDs+PAA-Na                   | -26.40 | 0.04  | 15.95            | 0.91       |
| CDs+TiO <sub>2</sub> +PAA-Na | -27.25 | 0.06  | 15.23            | 0.88       |

### SI8. Comparison of TE and TA kinetics of CDs.

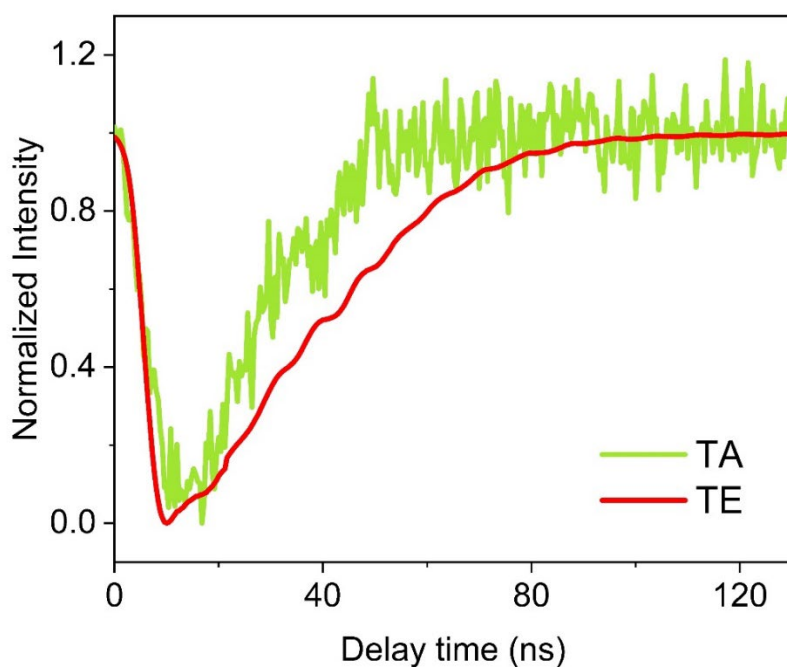

**Figure S5.** Normalized TE (@422 nm) and TA (@420 nm) kinetics (excited @ 365 nm) of CDs.
